# Supplementary material for: A brand-new generation of fluorescent nano-neural tracers: biotinylated dextran amine conjugated carbonized polymer dots
Source: Royal Society of Chemistry journal article supplement (doi:10.1039/c8bm01295d), 2019-01-01
Supplement: c8bm01295d1.pdf [file c8bm01295d1.pdf]

## Electronic Supplementary Information

### A brand-new generation of fluorescent nano-neural tracers: biotinylated dextran amine conjugated carbonized polymer dots†

Yang Liu,†<sup>a</sup> Junjun Liu,‡<sup>b</sup> Jiayi Zhang,<sup>a</sup> Xiucun Li,<sup>a</sup> Fangsiyu Lin,<sup>a</sup> Nan Zhou,<sup>\*c</sup> Bai Yang<sup>\*b</sup> and Lajin Lu<sup>\*a</sup>

#### Table of the Electronic Supplementary Information

1. **Figure S1.** The DLS image of CPDs.
2. **Figure S2.** TEM image of BDA-CPDs.
3. **Figure S3.** The DLS image of BDA-CPDs.
4. **Figure S4.** FTIR spectrum of BDA-CPDs.
5. **Figure S5.** Body weight of BDA-CPDs-treated rats at 1, 4, 7, 10, and 14 days.
6. **Figure S6.** Hematology analysis of BDA-CPDs-treated rats at 1 and 14 days. (A) White blood cells (WBC), (B) hemoglobin (Hb), (C) hematocrit (Hct), and (D) platelets (PLT).
7. **Figure S7.** Blood biochemistry results of BDA-CPDs-treated rats at 1 and 14 days. (A) Alanine transaminase (ALT), (B) aspartate transaminase (AST), (C) alkaline phosphatase (ALP), (D) total protein (TP), (E) the ratio of albumin and globulin (A/G), (F) blood urea nitrogen (BUN), (G) creatinine (Cr), and (H) uric acid (UA).
8. **Figure S8.** Histological evaluation of BDA-CPDs *in vivo* at the dose of 30 mg kg<sup>-1</sup>. The major organs were collected from the control and BDA-CPDs-treated rats (30 mg kg<sup>-1</sup>) at 7 days postinjection; neither histopathological abnormality nor lesion was observed in the images. The scale bar is 50 μm.
9. **Figure S9.** Fluorescent images of feces of the rats treated with BDA-CPDs (right) and that of the control rats (left), respectively.
10. **Figure S10.** At 1 h, 4 h and 24 h postinjection, urine of the rats treated with BDA-CPDs and that of the control rats were collected with syringes, respectively.

- 11. Figure S11.** Excretion analysis of BDA-CPDs. *Ex vivo* images of liver and bladder of rats were acquired at 5 min, 10 min, 20 min, and 30 min after injection of BDA-CPDs; the rats injected with saline served as the control.
- 12. Figure S12.** Anterograde tracing with AF594-Dextran in the peripheral nervous system. L5 DRG neurons were labelled with AF594-Dextran (A); transverse section showed the AF594-Dextran labelled primary afferents in the dorsal horn of the L5 spinal segment (B); (A and B) from left to right: dark field images, bright field images, and their overlaid images. Some representative neurons were indicated by white arrows. Scale bars are 100  $\mu\text{m}$  in A and 500  $\mu\text{m}$  in B. The representative areas are magnified optically in B.

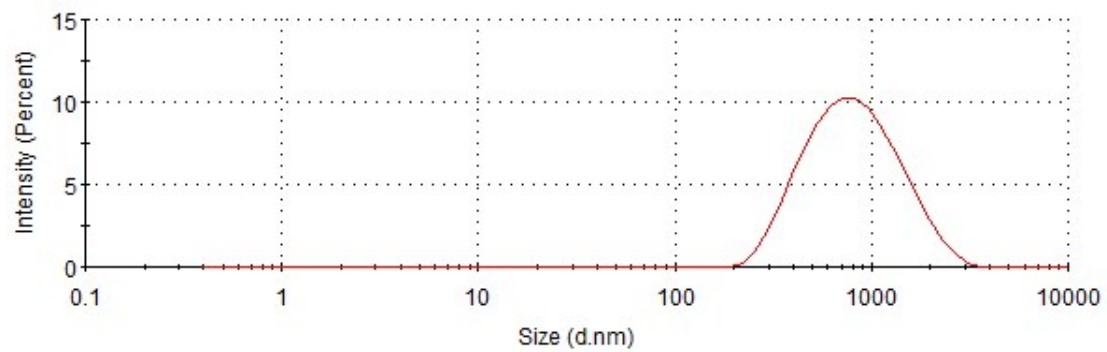

**Figure S1.** The DLS image of CPDs.

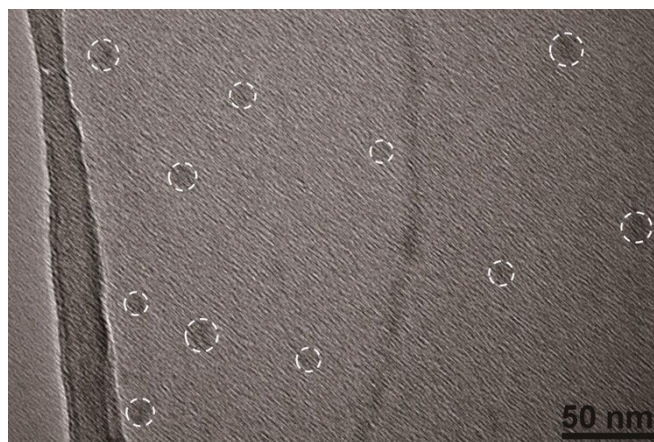

**Figure S2.** TEM image of BDA-CPDs.

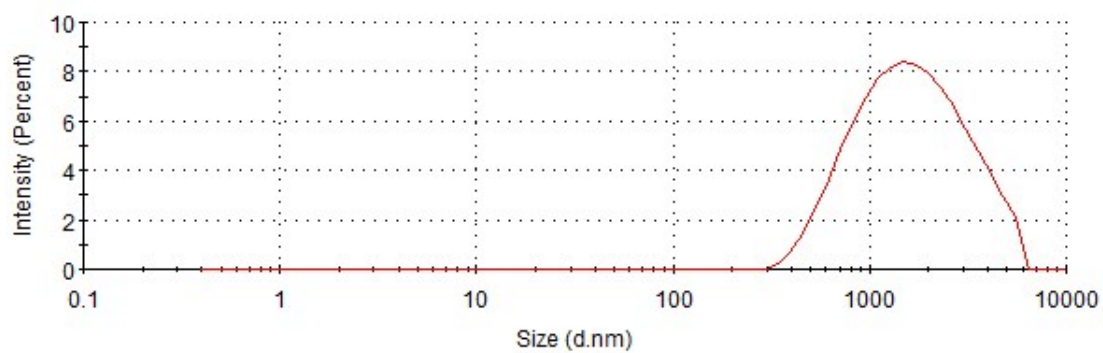

**Figure S3.** The DLS image of BDA-CPDs.

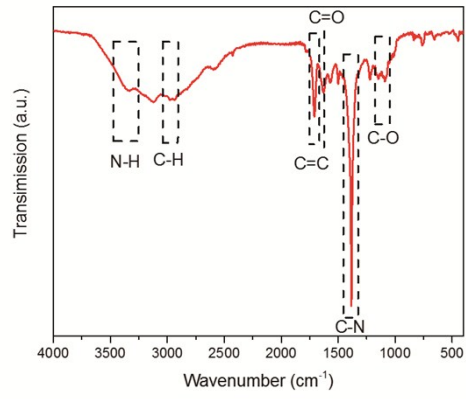

**Figure S4.** FTIR spectrum of BDA-CPDs.

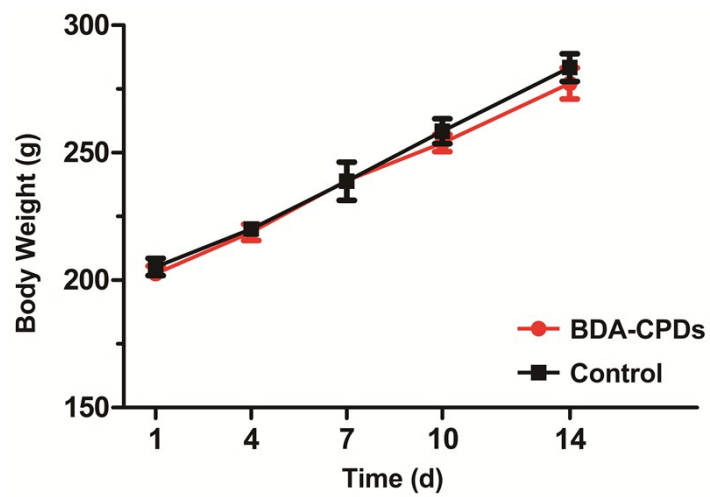

**Figure S5.** Body weight of BDA-CPDs-treated rats at 1, 4, 7, 10, and 14 days.

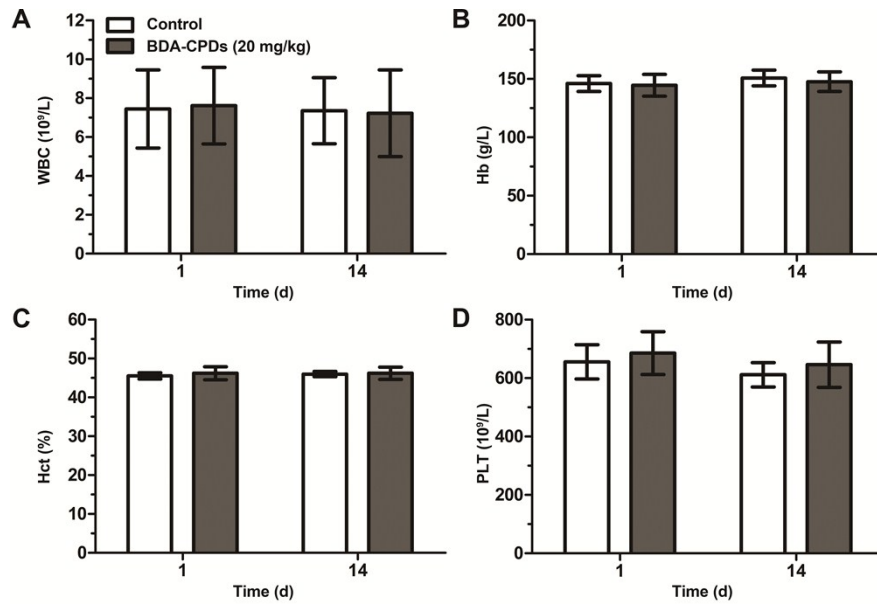

**Figure S6.** Hematology analysis of BDA-CPDs-treated rats at 1 and 14 days. (A) White blood cells (WBC), (B) hemoglobin (Hb), (C) hematocrit (Hct), and (D) platelets (PLT).

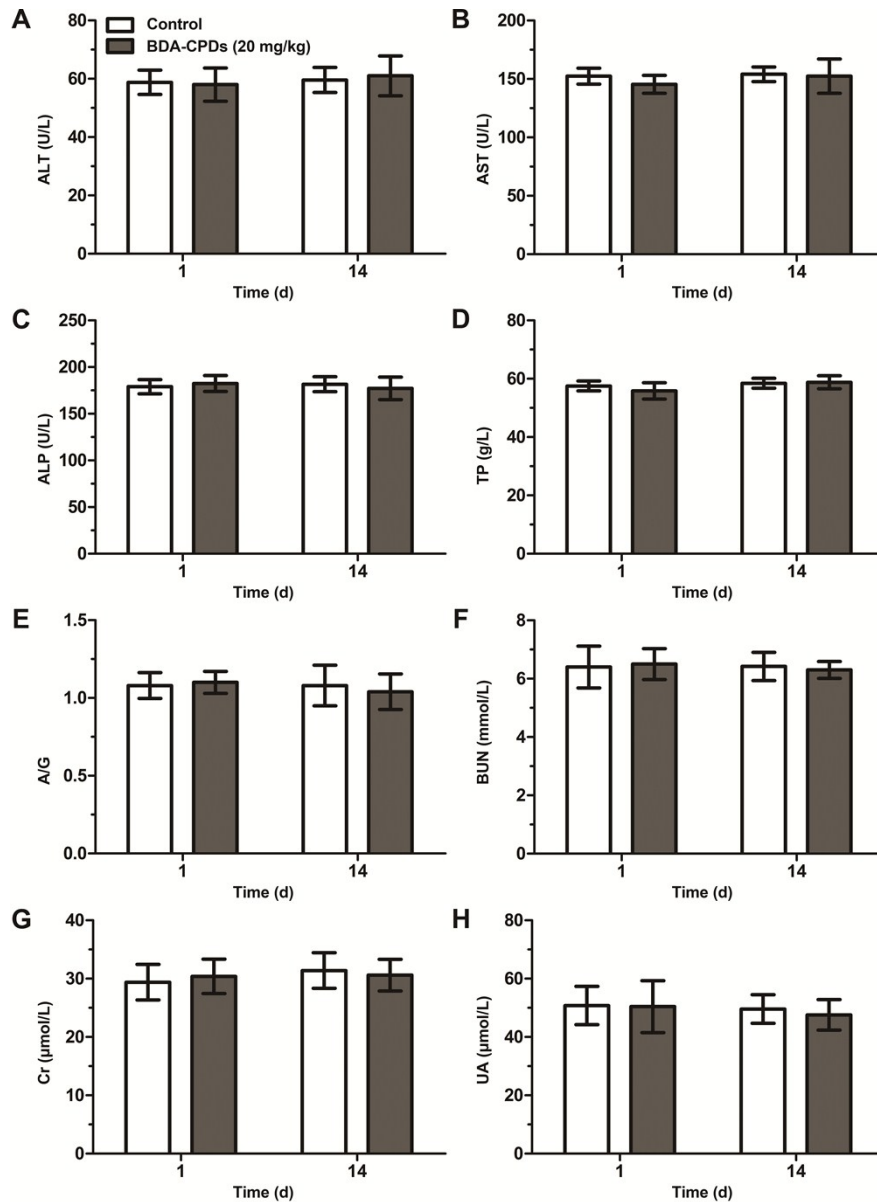

**Figure S7.** Blood biochemistry results of BDA-CPDs-treated rats at 1 and 14 days. (A) Alanine transaminase (ALT), (B) aspartate transaminase (AST), (C) alkaline phosphatase (ALP), (D) total protein (TP), (E) the ratio of albumin and globulin (A/G), (F) blood urea nitrogen (BUN), (G) creatinine (Cr), and (H) uric acid (UA).

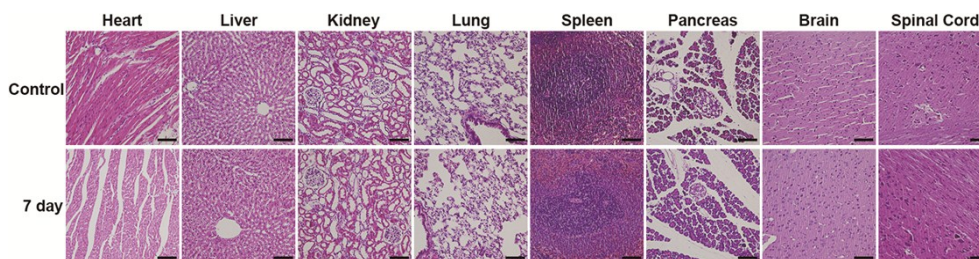

**Figure S8.** Histological evaluation of BDA-CPDs *in vivo* at the dose of 30 mg kg<sup>-1</sup>. The major organs were collected from the control and BDA-CPDs-treated rats (30 mg kg<sup>-1</sup>) at 7 days postinjection; neither histopathological abnormality nor lesion was observed in the images. The scale bar is 50 μm.

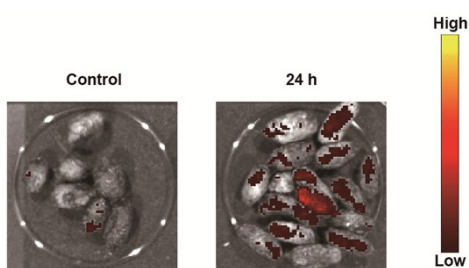

**Figure S9.** Fluorescent images of feces of the rats treated with BDA-CPDs (right) and that of the control rats (left), respectively.

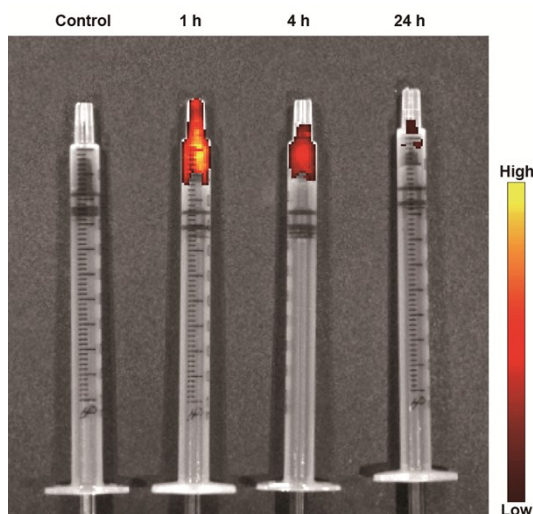

**Figure S10.** At 1 h, 4 h and 24 h postinjection, urine of the rats treated with BDA-CPDs and that of the control rats were collected with syringes, respectively.

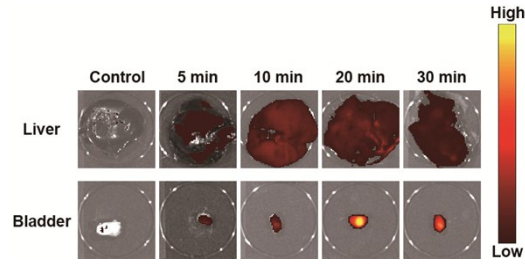

**Figure S11.** Excretion analysis of BDA-CPDs. *Ex vivo* images of liver and bladder of rats were acquired at 5 min, 10 min, 20 min, and 30 min after injection of BDA-CPDs; the rats injected with saline served as the control.

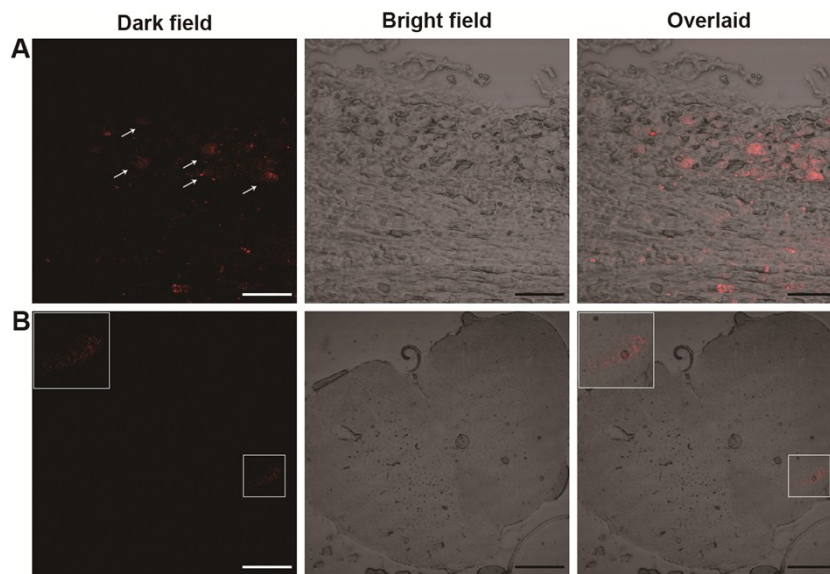

**Figure S12.** Anterograde tracing with AF594-Dextran in the peripheral nervous system. L5 DRG neurons were labelled with AF594-Dextran (A); transverse section showed the AF594-Dextran labelled primary afferents in the dorsal horn of the L5 spinal segment (B); (A and B) from left to right: dark field images, bright field images, and their overlaid images. Some representative neurons were indicated by white arrows. Scale bars are 100  $\mu\text{m}$  in A and 500  $\mu\text{m}$  in B. The representative areas are magnified optically in B.
